1 **GENE-TREE RECONCILIATION WITH MUL-TREES**

2

3 **Gene-tree reconciliation with MUL-trees to resolve polyploidy events**

4

5 Gregg W.C. Thomas\*, S. Hussain Ather, and Matthew W. Hahn

6

7 *Department of Biology and School of Informatics and Computing, Indiana University,*

8 *Bloomington, IN 47405.*

9

10 \*Corresponding author

11 Email: [grthomas@indiana.edu](mailto:grthomas@indiana.edu)

## 12 **Abstract**

13 Polyploidy can have a huge impact on the evolution of species, and it is a common occurrence,  
14 especially in plants. The two types of polyploids – autopolyploids and allopolyploids – differ in  
15 the level of divergence between the genes that are brought together in the new polyploid lineage.  
16 Because allopolyploids are formed via hybridization, the homoeologous copies of genes within  
17 them are at least as divergent as orthologs in the parental species that came together to form  
18 them. This means that common methods for estimating the parental lineages of allopolyploidy  
19 events are not accurate, and can lead to incorrect inferences about the number of gene  
20 duplications and losses. Here, we have adapted an algorithm for topology-based gene-tree  
21 reconciliation to work with multi-labeled trees (MUL-trees). By definition, MUL-trees have  
22 some tips with identical labels, which makes them a natural representation of the genomes of  
23 polyploids. Using this new reconciliation algorithm we can: accurately place allopolyploidy  
24 events on a phylogeny, identify the parental lineages that hybridized to form allopolyploids,  
25 distinguish between allo-, auto-, and (in most cases) no polyploidy, and correctly count the  
26 number of duplications and losses in a set of gene trees. We validate our method using gene trees  
27 simulated with and without polyploidy, and revisit the history of polyploidy in data from the  
28 clades including both baker's yeast and bread wheat. Our re-analysis of the yeast data confirms  
29 the allopolyploid origin and parental lineages previously identified for this group. The method  
30 presented here should find wide use in the growing number of genomes from species with a  
31 history of polyploidy.

32

## 33 **Keywords**

34 Polyploidy, whole genome duplication, reconciliation

35 Polyploidy as a result of whole genome duplication (WGD) can be a key evolutionary  
36 event. At least two ancient WGDs have been postulated at the origin of vertebrate animals (Ohno  
37 1970; Dehal and Boore 2005), with yet another occurring before the radiation of bony fishes  
38 (Amores et al. 1998; Van de Peer 2004). Polyploidy events are far more common in plants. It is  
39 estimated that approximately 25% of extant angiosperms have experienced a recent  
40 polyploidization, while 70% of angiosperm species show signs of a more ancient event (Barker  
41 et al. 2015). In fact, it is estimated that between 15 and 30% of speciation in angiosperms results  
42 from polyploidy (Wood et al. 2009; Mayrose et al. 2011). The prevalence of these events  
43 combined with the success of flowering plants suggests that WGDs must confer some advantage,  
44 possibly by increasing speciation rates (Werth and Windham 1991; Lynch and Force 2000; but  
45 see Mayrose et al. 2011; Muir and Hahn 2015), by decreasing extinction rates (Crow and  
46 Wagner 2006), or by providing species with a large amount of genetic material from which novel  
47 phenotypes can arise (Adams and Wendel 2005; Soltis and Soltis 2009; Edger et al. 2015).

48 Because of their importance in adaptation and speciation, multiple methods have been  
49 employed to study polyploidy events. The goals of these methods vary and can include:  
50 identifying polyploidy events, placing events in a phylogenetic context to identify the lineages on  
51 which they took place, or counting gene duplications and losses in the presence of polyploidy  
52 (Table 1). When placing polyploidy events in a phylogenetic context, either relatively or  
53 absolutely in time, care must be taken to distinguish between the two types of polyploidy.  
54 Autopolyploidy occurs when an individual inherits sets of chromosomes from parents of the  
55 same species. Genes duplicated as the result of autopolyploidy are paralogous. Following Glover  
56 et al. (2016), we will refer to these as ohnologs, although this term was originally used to  
57 describe a gene arising from any type of WGD event (Wolfe 2000). Allopolyploidy occurs when

58 **Table 1**

|         |                                       | Outcomes                   |                               |                                              |                               |
|---------|---------------------------------------|----------------------------|-------------------------------|----------------------------------------------|-------------------------------|
|         |                                       | Identify polyploidy events | Place polyploidy on phylogeny | Identify parental lineages of allopolyploids | Count duplications and losses |
| Methods | Low-copy gene trees/networks†         |                            | +                             | +                                            |                               |
|         | $K_s$ peaks‡                          | +                          | +*                            |                                              |                               |
|         | LCA reconciliation to standard trees† | +                          | +*                            |                                              | +*                            |
|         | Count-based‡                          | +                          | +                             |                                              | +                             |
|         | LCA reconciliation to MUL-trees †§    | +                          | +                             | +                                            | +                             |

59 \*These inferences are often incorrect for allopolyploids. See main text.

60 † Uses topology

61 ‡ Uses branch lengths

62 §Method described in this paper.

63

64 an individual inherits sets of chromosomes from parents of different species through  
65 hybridization. Genes duplicated as the result of allopolyploidy are called homoeologs. The term  
66 “homoeolog” was originally applied to relationships between chromosomes in allopolyploids  
67 (Glover et al. 2016), and seems most appropriate as a descriptor of the genealogical relationships  
68 of homologous genes within allopolyploids: not quite orthologs and not quite paralogs (Glover et  
69 al. 2016). Recognizing that homoeologs have relationships differing from those occurring  
70 between homologous genes within autopolyploids is key in preventing the mis-classification of  
71 allopolyploids as autopolyploids (cf. Doyle and Egan 2010).

72           There are many different methods used to identify and study polyploidy events. Non-  
73 phylogenetic methods, such as synteny and karyotyping, have long been used to identify  
74 polyploid species and will not be discussed further here (for review see Barker et al. 2015;  
75 Kellogg 2016). Phylogenetic methods (Table 1) use the relationships of genes between closely  
76 related species to identify and place polyploidy events on a phylogeny. One common approach is  
77 to build phylogenies of low-copy genes and to treat the resulting gene trees as species  
78 relationships (see Table S1 for a summary of studies that have used each method). Because these  
79 are low-copy genes, only polyploid species should be represented with multiple copies, in which  
80 case each copy represents either an ohnolog or a homoeolog. If the polyploid species or clade in  
81 question is an autopolyploid, the ohnologs will be sister to each other in the genome tree  
82 (topology in Fig. 1a); if they are allopolyploids, the homoeologs will be sister to different diploid  
83 taxa (as long as these lineages are sampled; topology in Fig 1b). These diploid taxa are either the  
84 direct progenitors of the allopolyploid species (the parental *species*) or the extant taxa most  
85 closely related to the progenitors (the parental *lineages*; Fig S1) if the direct progenitors are  
86 extinct or were not sampled. Such methods can benefit from including more species closely  
87 related to the parental lineages of the polyploids in order to separate multiple WGDs close in  
88 time. Incongruence caused by error in gene tree inference or incomplete lineage sorting can be  
89 addressed by sequencing more genes (e.g. Brassac and Blattner 2015), or by comparing nuclear  
90 loci to genes in the mitochondria or chloroplast (e.g. Popp and Oxelman 2001), and methods  
91 have been devised to make consensus phylogenies from sets of gene trees (e.g. Huber et al. 2006;  
92 Marcussen et al. 2012; Marcussen et al. 2015). However, the use of low-copy genes is only  
93 applicable for more recent polyploidy events, as additional paralogs created by gene duplication

94 (and the loss of homoeologs) are not considered by these methods (Marcussen et al. 2012; Jones  
95 et al. 2013).

96 In order to identify previously unknown polyploidy events,  $K_s$ -based, least common  
97 ancestor (LCA) reconciliation, and count-based methods are used (Table 1; Table S1).  $K_s$ -based  
98 methods start by identifying pairs of duplicate genes within a species of interest, then measuring  
99 the synonymous divergence, or  $K_s$ , between them. In a species that has not experienced  
100 polyploidy, the expectation is that most duplicates will be very recent – and have a low  $K_s$  –  
101 while very few pairs will have high  $K_s$  (Lynch and Conery 2000). However, in a lineage in which  
102 polyploidy has occurred, peaks observed in this distribution are said to correspond to a burst of  
103 duplications from the WGD, though this is not always the case (see below; Lynch and Conery  
104 2000; Blanc and Wolfe 2004). Peaks observed in a single species are placed on the tip branch of  
105 a species phylogeny, while peaks of  $K_s$  shared among multiple species are placed on internal  
106 branches (e.g. Cui et al. 2006; Barker et al. 2008; Barker et al. 2009).

107 LCA-based methods consider the topology of gene trees, and attempt to map duplication  
108 events onto an accepted species phylogeny via gene tree-species tree reconciliation (Goodman et  
109 al 1979; Page 1994). Gene duplications on each branch of a species tree can be counted, and  
110 branches with an unusually large number of gene duplications per unit time can indicate a  
111 polyploidy event (Cannon et al. 2015). Often LCA reconciliation is carried out on simplified  
112 gene trees (Bowers et al. 2003; Li et al. 2015), but the inferences remain the same. Finally,  
113 recent likelihood-based “count” methods use gene copy-numbers to identify branches with more  
114 gene duplications than expected without polyploidy (Rabier et al. 2014; Tiley et al. 2016).  
115 Neither gene trees nor pairwise distances are calculated among homologs, and instead the  
116 number of gene copies in each genome is used as a character that evolves across a species

117 phylogeny.  $K_s$ , LCA, and count-based methods can be used for analysis of polyploidy events at  
118 any depth in time, though they are most commonly used for more ancient events where one or  
119 both parental lineages are extinct.

120         However, the  $K_s$  and LCA methods described above do not give a full picture of the  
121 evolutionary history of a polyploidy event, and may be positively misleading about multiple  
122 aspects of WGDs. This is because these methods do not take into account the difference in the  
123 degree of divergence between duplicate gene pairs in the two types of polyploidy. Specifically,  
124  $K_s$ - and LCA-based methods fail because they treat the two homologous copies of a gene arising  
125 from polyploidy as paralogs regardless of their mode of origin – that is, homologous genes  
126 related by a duplication event at their most recent common ancestor (Fitch 1970). However, for  
127 allopolyploids, these two genes are more akin to orthologs, as they are actually related by a  
128 speciation event at their most recent common ancestor (Glover et al. 2016). While these  
129 methods will work for autopolyploids—since the divergence time of orthologs is the true timing  
130 of the WGD (Fig. 1a)—for allopolyploids they incorrectly identify the most recent common  
131 ancestor of the species that hybridized to form the polyploid as the time that the WGD occurred  
132 (Fig. 1b) (Doyle and Egan 2010; Kellogg 2016). When using LCA-based gene tree methods,  
133 WGDs due to allopolyploidy can also lead to incorrect inferences of many additional gene  
134 duplications and losses when none have occurred (see Methods).

135

136

137

138

139

140 **Figure 1:**

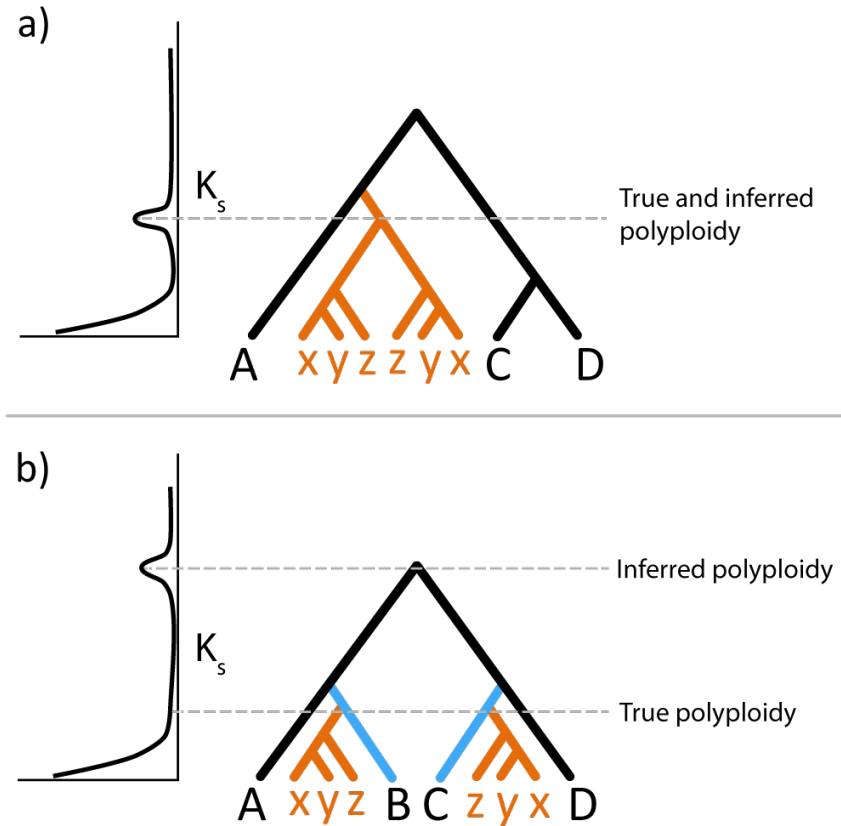

141

142 One major issue shared by  $K_s$ -based, LCA, and gene count methods when used to study  
143 polyploidy is that the typical bifurcating, singly-labeled representations of species relationships  
144 (henceforth referred to as singly-labeled trees) only represent one of the multiple homoeologous  
145 sub-genomes (sets of chromosomes) in any allopolyploid species (Fig. 2a). Species networks are  
146 the correct representation for allopolyploids as they can highlight both the parental lineages  
147 involved and the relative timing of the hybridization event (Fig. 2b) (Linder and Rieseberg 2004;  
148 Huber and Moulton 2006; Jones et al. 2013). However, networks represent species relationships,  
149 and therefore can be less practically useful for analyses involving multiple individual genes in  
150 allopolyploid genomes. An alternative and fully equivalent representation to the species



151 relationships in networks uses multi-labeled trees (MUL-trees, sometimes referred to as “genome  
152 trees” in this context) to represent genome relationships for polyploidy events (Fig. 2c) (Huber et  
153 al 2006; Lott et al. 2009). MUL-trees are trees in which the tip labels are not necessarily unique  
154 (Huson et al 2006); this allows one to represent all sub-genomes in an allopolyploid as  
155 descendants of different parental lineages (Fig. 2c), or as descendants of the same lineage for  
156 autopolyploids (e.g. Fig. 1a).

157 **Figure 2:**

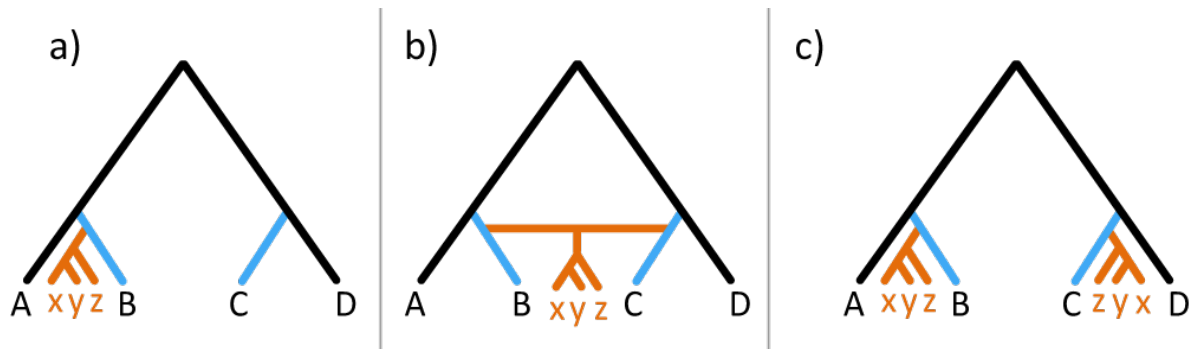

159 Here, we have adapted the LCA algorithm for use with MUL-trees, implementing this  
160 method in the software package GRAMPA (Gene-tree Reconciliation Algorithm with MUL-trees  
161 for Polyploid Analysis). This representation and algorithm allows us to correctly infer gene  
162 duplications and losses in the presence of polyploidy, and to identify the most likely placement  
163 of polyploid clades and their parental lineages. In most cases, it should also be able to infer  
164 whether or not a polyploidy event has taken place. We demonstrate that this new method works  
165 on simulated data, and we revisit two different datasets that include allopolyploid species,  
166 confirming a newly presented conclusion on the parental lineages leading to the clade that  
167 includes baker’s yeast.

168

169

## 170 **Methods**

### 171 *Algorithm*

172 While the problem of reconciling gene trees to reticulated phylogenies has been explored  
173 before (Yu et al. 2013; To and Scornavacca 2015), we have devised an LCA mapping algorithm  
174 that reconciles gene phylogenies to genome relationships represented as MUL-trees, a natural  
175 representation of polyploidy events. The LCA mapping algorithm is a method that identifies and  
176 counts duplication and loss events on a gene tree given an accepted singly-labeled species tree  
177 (Goodman et al 1979; Page 1994). It can also be used for species tree inference by searching for  
178 the species tree that minimizes the total number of duplications and losses inferred given a set of  
179 gene trees (Guigó et al. 1996). The main hurdle in applying LCA mapping to MUL-trees is that,  
180 when reconciling to a MUL-tree, some nodes have more than one possible map. In particular,  
181 some tip nodes cannot be initialized with a single map (because tips are necessarily not uniquely  
182 labeled), which subsequently allows internal nodes to also have more than one possible map. We  
183 side-step this problem by trying all possible combinations of initial tip maps and applying the  
184 parsimony assumption – that the correct map will have the lowest score.

185 In standard LCA mapping each internal node in the gene tree,  $n_g$ , is defined by the set of  
186 species at the tips below it in the tree. The same node is also associated with a node in the  
187 species tree,  $n_s$ , through a map,  $M(n_g)$ .  $M(n_g) = n_s$ , where  $n_s$  is the node in the species tree  
188 that is the least common ancestor of the species that define  $n_g$ . For example, in the gene tree  
189 depicted in Figure 3a, node 1G is defined by the tips A1 and B1. These tips map to species A and  
190 B, respectively, and the first node in the singly-labeled species tree (going from tips to root) that

191 includes species A and B is 1S (Fig. 3b). Therefore,  $M(1G) = 1S$ . This process is repeated for  
192 every internal node in the gene tree until all nodes are mapped. For each  $n_g$  there is a single  
193 possible node in the species tree to which it can map; however, nodes in the species tree can have  
194 multiple nodes map to them. Nodes in the gene tree are said to be duplication nodes when they  
195 map to the same species tree node as at least one of their descendants (for example, nodes 3G  
196 and 4G in Fig. 3b).

197 When the mapping of a gene tree ( $T_G$ ) is performed, nodes in the gene tree are classified  
198 as either duplication or speciation nodes, based on the procedure described above. The number of  
199 duplications that occur in the gene tree ( $D_{T_G}$ ) is then just the number of duplication nodes.  
200 Losses along a branch in the gene tree,  $b_g$ , subtended by  $n_g$  are counted as the difference in the  
201 depth of the maps of a node in the gene tree and its ancestor (Durand et al. 2006):

$$l_{b_g} = \left( \text{depth} \left( M(n_g) \right) - \text{depth} \left( M \left( \text{ancestor}(n_g) \right) \right) - 1 \right) + \text{IsDup} \left( \text{ancestor}(n_g) \right)$$

202 Where *IsDup* is a function that returns 1 if the ancestor of  $n_g$  is a duplication node and 0  
203 otherwise. The depth of a node refers to its distance from the root in the species tree. The node at  
204 the root has a depth of 1, with each node farther down the tree having depth +1 from its ancestor.  
205 For example, in Fig. 3b, node 3S (the root) has a depth of 1, node 1S has a depth of 2, and nodes  
206 A and B each have a depth of 3. The total number of losses that occurred on the gene tree ( $L_{T_G}$ )  
207 is simply the sum of the number of losses on all branches,  $L_{T_G} = \sum_{i=1}^B l_{b_i}$ , and the reconciliation  
208 score ( $S_{T_G}$ ) for this gene tree is:

$$S_{T_G} = D_{T_G} + L_{T_G}$$

209

210 **Figure 3:**

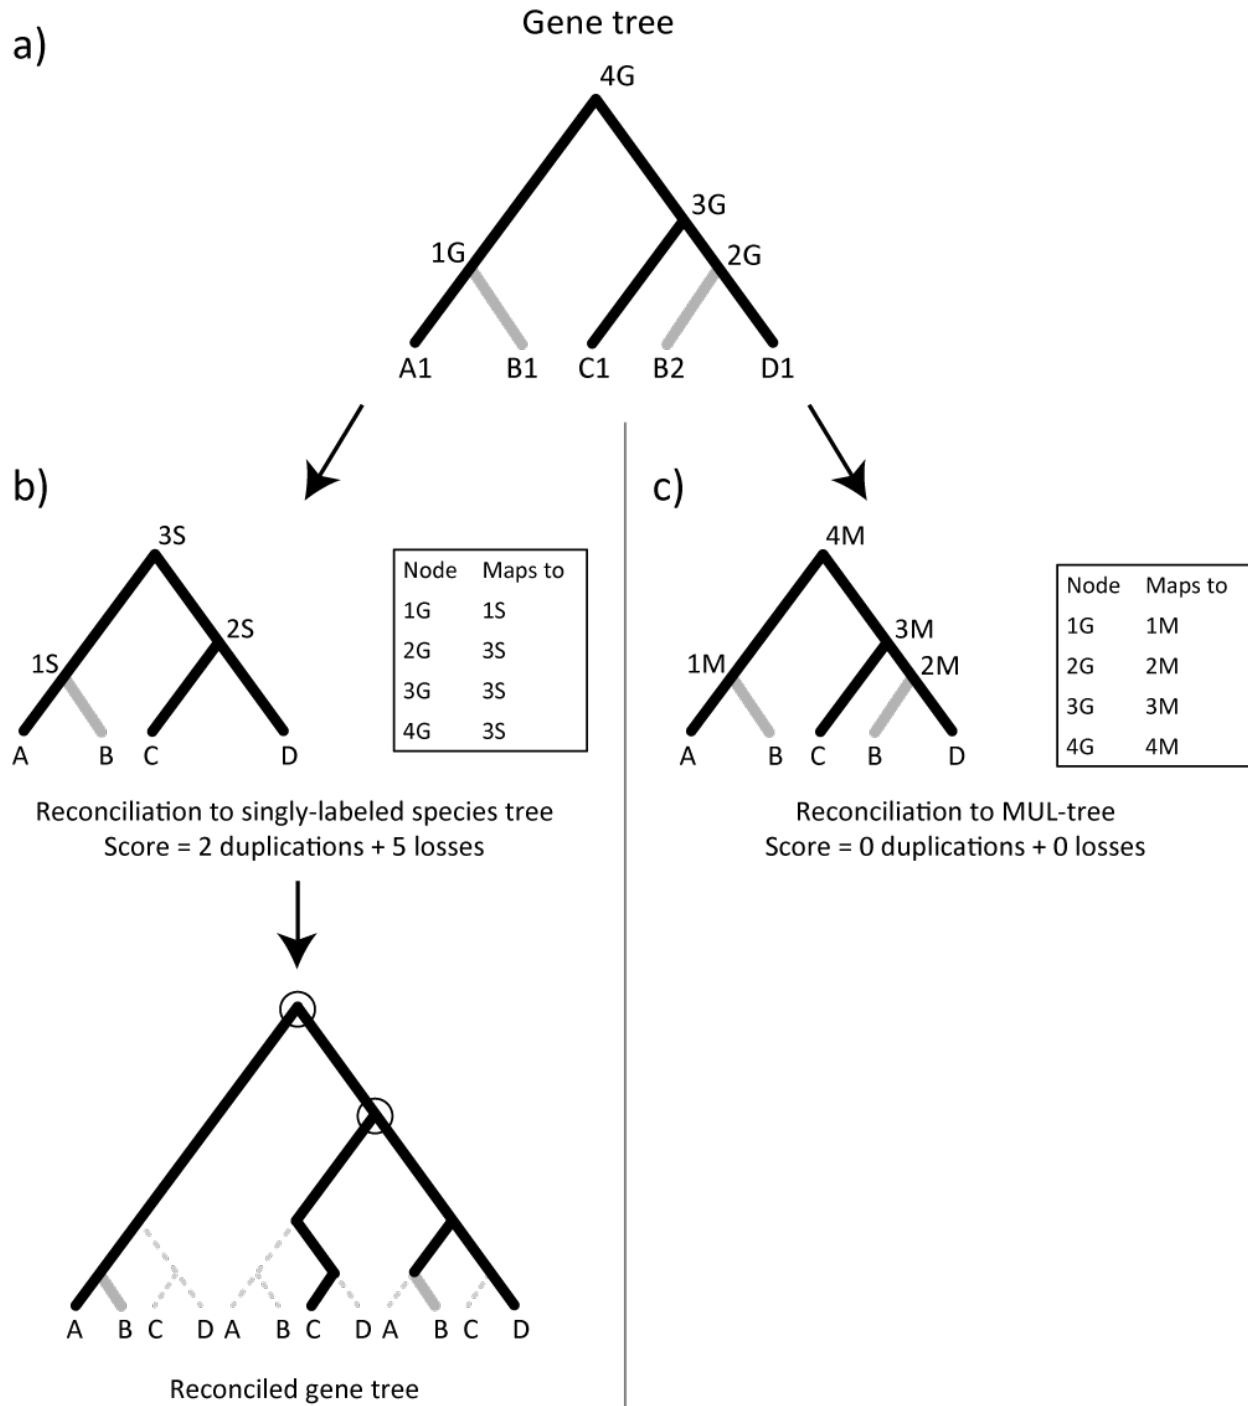

211

212

213 Many reconciliation algorithms do not count losses in cases where the root of a gene tree  
214 does not map to the root of the species tree. This happens because there are no nodes in the gene  
215 tree mapping to entire branches of the species tree, and therefore no calculations can be  
216 performed. In these cases (when  $n_g = root$ ) we add  $depth(M(n_g) - 1)$  to  $L_{T_G}$  because the  
217 most parsimonious solution is simply a single loss of each branch above this node in the species  
218 tree.

219 The entire reconciliation process hinges on the fact that the mapping function is  
220 initialized with the tips of the gene tree mapped to their corresponding species label in the  
221 species tree. In a MUL-tree, repeated clades represent the sub-genomes of the polyploid species,  
222 and their placement in the MUL-tree defines parental lineages of the polyploid event (Fig. 2c,  
223 Fig S1). Given a gene tree, we proceed with the LCA mapping algorithm as described above,  
224 except that any tip that maps to a polyploid species now has two possible initial maps: to either  
225 of the sub-genomes represented in the MUL-tree (species “B” in Fig. 3c). This leads to  
226 unresolved internal maps and the inability to classify nodes correctly. To solve this problem, we  
227 run LCA mapping with a tip within a polyploid clade initialized to one sub-genome first, and  
228 then we run LCA mapping again with that same tip initialized to the other sub-genome, giving us  
229 two maps and two reconciliation scores for the single gene tree. We then apply the parsimony  
230 principle for these two possible maps: whichever initial mapping results in the lowest score is the  
231 correct map. If there is more than one gene in the gene tree from the polyploid clade we try all  
232 possible combinations of initial maps. In cases where multiple different mappings are all tied for  
233 the lowest score, we report all possible mappings.

234 The MUL-tree reconciliation algorithm is applicable for any number of genes in any  
235 number of polyploid species, but the algorithm becomes very slow for large polyploid clades

236 because of the large number of combinations of initial maps to consider. Given that a gene tree  
237 has  $m$  genes represented from polyploid species, the run time for mapping this gene tree is  
238  $O(2^m n)$ , since the mapping algorithm itself is linear for a tree with  $n$  nodes (Zmasek and Eddy  
239 2001) and we perform  $2^m$  maps (Fig. S2b). A similar brute force method was devised by Yu et  
240 al. (2013) when mapping alleles in a gene tree to a species tree in order to infer hybridization. In  
241 the context of polyploidy, we devised several methods to expedite the process of choosing the  
242 correct map by using context within both the gene tree and the MUL-tree. If any genes from  
243 different polyploid species form a clade within the gene tree, then the most parsimonious  
244 solution will always have them mapping to the same sub-genome in the MUL-tree. We group  
245 these nodes together, essentially treating the clade as a single tip of the tree, and try both maps on  
246 the group as a whole rather than on each tip individually (Fig. S2c). We also consider the species  
247 sister to the polyploid clades in the MUL-tree. If we observe clades in the gene tree that include  
248 only polyploid species and these sister species, then the most parsimonious initial map for that  
249 group is guaranteed to be the one in the MUL-tree with the corresponding sister species. The  
250 algorithm therefore fixes the maps of these nodes before proceeding (Fig. S2d). This method  
251 gives a reconciliation score for mapping a single gene tree to a single MUL-tree, and can be  
252 applied to a set of gene trees to obtain a total reconciliation score for a MUL-tree. Even with the  
253 speed-ups described above, some gene trees can still take an exorbitant amount of time to  
254 reconcile. We therefore place a cap of 15 on the number of groups that can be considered for a  
255 given gene tree. This limits any gene tree to at most  $2^{15} = 32,768$  possible maps. Gene trees  
256 over this cap are skipped. The number of groups in a gene tree can vary for different MUL-trees.  
257 To ensure consistency when comparing scores between MUL-trees, we first calculate the number

258 of groups for each gene tree/MUL-tree combination and filter out gene trees that are over the cap  
259 for any MUL-tree.

260         Thus far we have assumed that the placement of the polyploidy event is already known,  
261 since a single MUL-tree represents a single polyploid scenario. When it is not known, we have  
262 implemented a search strategy to find the most parsimonious placement of a polyploidy event,  
263 given a singly-labeled species tree. We define two nodes of interest in a singly-labeled species  
264 tree that we use to build a MUL-tree. Node H1 defines the location of the sub-genome for the  
265 polyploid species represented in the singly-labeled species tree (as in Fig. S3a). Node H2 defines  
266 the location of the second parental lineage and unrepresented polyploid sub-genome (Fig. S3a).  
267 When H1 is specified, the sub-tree that is rooted by it and the branch that it subtends are copied  
268 and placed on the branch that is subtended by H2. Our modified LCA mapping algorithm is then  
269 run on the resulting MUL-tree, and a total reconciliation score is obtained by summing across  
270 scores for all gene trees. The algorithm can be limited to a specified pair of H1 and H2 nodes, or  
271 only a specified H1 node (searching for H2), or no nodes specified (searching for both H1 and  
272 H2). The MUL-tree defined by a particular H1 and H2 with the lowest total reconciliation score  
273 reveals the location and type of the most parsimonious polyploidy event. Placement of H1 and  
274 H2 as sister to different lineages indicates allopolyploidy, while placement of H1 and H2 on the  
275 same node in the species tree represents an autopolyploid event. We also perform LCA  
276 reconciliation to the input singly-labeled tree. In many instances, if no polyploidy has occurred in  
277 the sampled lineages, the singly-labeled tree will return the lowest score.

278         GRAMPA's search strategy guarantees that it will be able to distinguish between allo-,  
279 auto-, and no polyploidy in most cases (see Results). However, there are circumstances in which  
280 the complete extinction of both parental lineages of an allopolyploid would lead us to incorrectly

281 infer autopolyploidy. The distinction between parental lineages and parental species is important  
282 when discussing allopolyploids. We define a parental lineage of an allopolyploid as the clade of  
283 species more closely related to one sub-genome than the other (Fig. S1). A parental lineage can  
284 include the direct parental species that hybridized to form the allopolyploid (if they are extant),  
285 but also can include species closely related to the parents. For example, in Fig S1a, the true  
286 network shows that the species A' and B' hybridized to form the polyploid lineage P. If both  
287 parental species are extant and sampled, it is clear that we will recover the proper placement of  
288 the hybridization event (Fig S1a). However, both of these parental species also have sister  
289 species (A and B), which are part of the two parental lineages. Even with extinction of one (Fig  
290 S1b) or both parental species, our method will still be able to identify the parental lineages, and  
291 therefore correctly infer allopolyploidy. These two cases (Figs. S1a and b) are sometimes  
292 referred to as “neopolyploidy” (Mandakova et al. 2010). Similarly, in the case of the complete  
293 extinction of one parental lineage (Fig S1c; referred to as “mesopolyploidy”), our method will  
294 still implicitly identify such a lineage via the placement of H1 or H2 on an internal node of the  
295 singly-labeled tree. The only instance in which our method leads to an incorrect inference of the  
296 type of polyploidy is in the case of the complete extinction of both parental lineages (Fig S1d;  
297 sometimes referred to as “paleopolyploidy”), in which case autopolyploidy will be inferred.  
298 These definitions of neo-, meso-, and paleopolyploidy are based on genealogical context alone  
299 and differ from those based on cytology (e.g. Mandakova et al. 2010).

300

### 301 ***Simulations***

302 We first checked that our modified LCA mapping algorithm counted the correct number  
303 of duplications and losses by manually reconciling a small set of 25 gene trees onto 8 MUL-trees



304 and 1 singly-labeled tree to represent varying cases of gain, loss, and polyploidy. We generated  
305 our MUL-trees by starting with a single arbitrary singly-labeled species tree topology (Fig. S3a)  
306 and specifying a node as H1. With that node as H1 we tried every possible placement of node H2  
307 to construct the MUL-trees (one example is shown in Fig S3b). Gene trees were made by  
308 randomly adding or removing branches from these nine trees. Our method always agreed with  
309 the expected counts for each type of event (Table S2).

310         Next we used gene trees simulated in the GuestTreeGen program within JPrIME  
311 (Sjöstrand et al. 2013) with varying levels of gene gain and loss and incomplete lineage sorting  
312 (ILS) to test the search feature of our algorithm. Specifically, we want to know if, given sets of  
313 gene trees simulated under conditions of allo-, auto-, or no polyploidy, our algorithm correctly  
314 identifies the type of polyploidy that has occurred and the parental lineages involved in the  
315 polyploidization event (Fig S4). To simulate scenarios with polyploidy, we started with an  
316 arbitrary MUL-tree with one clade represented twice, indicating both sub-genomes of a set of  
317 polyploid species (Fig S4a and b). JPrIME does not accept MUL-trees as input, so we added  
318 temporary marker labels to species within one of the polyploid clades. JPrIME then generated  
319 1000 gene trees with this labeled MUL-tree as input. Gene trees were simulated under five  
320 scenarios of gain and loss rates and three scenarios of ILS, giving us 15 sets of 1000 gene trees  
321 each for each starting tree of allopolyploidy (Fig S4a), autopolyploidy (Fig S4b), and no  
322 polyploidy (Fig S4c). We removed the marker labels from the gene trees and used them as input  
323 for our algorithm, along with a singly-labeled tree in which only one of the polyploid clades is  
324 represented. We then searched for the H1 and H2 nodes that minimized the reconciliation score.  
325 For the simulations of allopolyploidy, we also gave as input to our algorithm in a separate run the

326 alternate singly-labeled topology with the other polyploid clade represented. In all, this resulted  
327 in 45 simulated datasets and 60 inferences by our algorithm.

328

### 329 *Yeast*

330 The yeast data came from the study of Marcet-Houben and Gabaldón (2015). We use the  
331 species tree topology depicted in their supplementary figures with all 27 species present (Fig.  
332 S5). We downloaded the set of 5,402 gene trees used by Marcet-Houben and Gabaldón (2015)  
333 from PhylomeDB (Phylome ID: 206). These were the main inputs to our algorithm, along with  
334 the baker's yeast clade set as the H1 node (node n5 in Fig. 4a and Fig. S5). We then let our  
335 algorithm search for the optimal placement of H2, which would allow for identification of  
336 parental lineages of this polyploidy event.

337 Several steps were required to prepare the gene trees for our program. 779 trees consisted  
338 of labels that were either identical to or a subset of another tree. These 779 trees were removed.  
339 Notung version 2.8 (Durand et al. 2006) was used to root the gene trees and to perform bootstrap  
340 rearrangement with a 0.7 bootstrap threshold. Bootstrap rearrangement ensures more accurate  
341 gene trees by finding the most parsimonious (with respect to duplications and losses) topology  
342 around nodes with low bootstrap support by finding the lowest scoring topological ordering of  
343 affected taxa. Finally, we capped our algorithm to consider at most 10 collapsed groups (Fig.  
344 S1). This step cut out an additional 636 trees leaving us with a final set of 3,987 gene trees to  
345 reconcile. We followed a similar procedure for the set of 963 trees containing "ohnologs"  
346 obtained from Marcet-Houben and Gabaldón (2015)  
347 ([http://genome.crg.es/~mmarcet/yeast\\_hybrids/phylome\\_table.htm](http://genome.crg.es/~mmarcet/yeast_hybrids/phylome_table.htm)), resulting in 505 usable gene

348 trees. Analysis of these trees containing homologs believed to be due to WGD yielded identical  
349 results as those of the whole dataset.

350

### 351 *Wheat*

352 We downloaded 55,519 gene trees from Ensembl Plants v31  
353 (<ftp://ftp.ensemblgenomes.org/pub/plants/release-31/emf/ensembl-compara/homologies/>)  
354 (Kersey et al. 2016). We also obtained the species tree that Ensembl uses for its analyses (Kersey  
355 et al. 2016). Both gene trees and species trees were pruned using Newick Utilities (Junier and  
356 Zdobnov 2010) so that they only included 10 Poaceae species, including the hexaploid bread  
357 wheat species, *Triticum aestivum* (Fig. S6). These species, along with all three bread wheat sub-  
358 genomes, are depicted in Supplementary Figure S6. Because the D sub-genome of *Triticum*  
359 *aestivum* may be the result of homoploid hybridization between the A and B sub-genomes  
360 (Marcussen et al. 2014), its placement in the singly-labeled species tree is somewhat arbitrary.  
361 We chose to place the D sub-genome and its related species *Aegilops tauschii* as sister to the A  
362 sub-genome and its related species, *Triticum urartu*, in our representation of the species tree. The  
363 gene trees were filtered so they only contained between 5 and 100 tips. This left 9,147 gene trees  
364 on which to run our algorithm.

365 We proceeded by removing one of the three sub-genomes (A, B, or D) from the species  
366 tree and pruning all genes that originated from that same sub-genome from the gene trees. For  
367 the remaining genes, we masked all labels that specify their sub-genome of origin. We then gave  
368 our algorithm this set of gene trees along with a singly-labeled species tree with only one of the

369 two bread wheat sub-genomes represented. We allowed our algorithm to search for H1 and H2  
370 with the expectation that the optimal MUL-tree will correctly represent both wheat sub-genomes.

371

372

## 373 **Results**

### 374 *Performance of algorithm*

375 Our algorithm is implemented in the software package GRAMPA (Gene-tree  
376 Reconciliation Algorithm with MUL-trees for Polyploid Analysis; available at  
377 <https://github.com/gwct/grampa>). The main inputs of the program are a species tree (singly-  
378 labeled or MUL) and a set of gene trees. If a singly-labeled tree is input, possible polyploid  
379 lineages may be specified (H1 nodes; Fig. S3) along with possible placements of the second  
380 parental lineage (H2 nodes; Fig. S3). With H1 specified, GRAMPA will search for the optimal  
381 placement of the H2 node. If no H1 and H2 nodes are defined, GRAMPA will generate MUL-  
382 trees based on all possible H1 and H2 nodes. In either case, GRAMPA will return a  
383 reconciliation score for each MUL-tree considered (as well as for the original singly-labeled  
384 tree), including the total number of duplications and losses for each individual gene tree. If a  
385 MUL-tree is input (i.e. H1 and H2 specified), GRAMPA will return a total reconciliation score  
386 for the tree and individual duplication and loss scores for the gene trees.

387 We checked that our modified LCA mapping algorithm counted the correct number of  
388 duplications and losses by manually reconciling a small set of 25 gene trees onto 8 MUL-trees  
389 that represent varying cases of gain and loss (Table S2). Our method always agrees with the  
390 expected counts for each type of event. GRAMPA's search method was then validated using

391 larger sets of gene trees simulated using JPrIME (Sjöstrand et al. 2013) with varying rates of  
392 gene gain and loss, and varying amounts of ILS. In every simulation scenario with polyploidy  
393 that we tested GRAMPA returned the expected MUL-tree, indicating that we can correctly  
394 distinguish between allo- and autopolyploidy, and that in cases of allopolyploidy we can  
395 correctly identify the parental lineages that gave rise to the polyploid species (Table S3). For  
396 example, when GRAMPA was given a set of gene trees simulated from an allopolyploidy event  
397 (Fig S4a) and a corresponding singly-labeled species tree with only one sub-genome represented,  
398 it always found the correct MUL-tree. Similarly, given a set of gene trees simulated from an  
399 autopolyploidy event (Fig S3b), GRAMPA always returns the correct autopolyploid MUL-tree.  
400 These results remain true regardless of gene gain and loss rates or levels of ILS, though with  
401 increasing ILS rates we observe inflated counts of gene duplication and loss, as expected with an  
402 LCA-based algorithm (Hahn 2007). We also assessed GRAMPA's performance when given a  
403 singly-labeled species tree (Fig. S4c) and gene trees simulated from that species tree; in this  
404 scenario no polyploidy has occurred. Reconciliation to the input singly-labeled species tree  
405 correctly resulted in the lowest score, indicating that we are able to identify when no polyploidy  
406 has occurred.

407 Distinguishing between allo-, auto-, and no polyploidy simply based on gene-tree  
408 topologies is possible because of the penalties that naturally arise when reconciling to the  
409 incorrect species topology. For instance, if allopolyploidy has occurred most gene trees should  
410 have two copies of the polyploid species present, inducing a penalty of at least one duplication  
411 and one loss when reconciling to a singly-labeled tree with only one copy represented (Fig. S7a).  
412 This penalty is increased by one loss with each additional lineage between the two polyploid  
413 clades (Fig. S7a, gene tree 1). Asymmetric gene loss between the two homoeologous sub-

414 genomes can also provide a signal of allopolyploidy, with extra duplications and losses inferred  
415 for gene trees in which homoeologs are present only in the sub-genome that is not represented in  
416 the singly-labeled tree (Fig S7a, gene trees 2 and 3). Additional polyploid species make  
417 asymmetric gene loss more easily detectable, increasing power to detect polyploidy. A similar  
418 penalty occurs when reconciling gene trees resulting from autopolyploidy to a singly-labeled tree  
419 (Fig S7b), though this penalty is less pronounced since there is only one possible singly-labeled  
420 tree, making asymmetric gene loss indistinguishable.

### 421 *Analysis of baker's yeast*

422 We revisited the interesting case of the WGD occurring in the ancestor of *Saccharomyces*  
423 *cerevisiae* (baker's yeast), a well-known example of polyploidy (Wolfe and Shields 1997; Kellis  
424 et al. 2004). While early authors were circumspect about whether this WGD was an auto- or  
425 allopolyploid (Wolfe and Shields 1997; Kellis et al. 2004), Marcet-Houben and Gabaldón (2015)  
426 recently postulated that this clade (labeled as the “BY” clade in Fig. 4) was the result of an  
427 allopolyploidy event. These authors detected a mismatch in the timing of duplications inferred by  
428 count methods and reconciliation, as would be expected given allopolyploidy. This led to the  
429 conclusion that an ancient hybridization occurred to create an allopolyploid. This hybridization  
430 was inferred to have been between an ancestor of the ZT clade (Fig. 4) and an extinct lineage  
431 sister to the KLE, ZT, and BY clades (node n3 in Fig. 4). However, the phylogenetic methods  
432 employed by the authors to identify the parental lineages of the allopolyploid could not naturally  
433 deal with reticulation in an allopolyploidy event, and thus may have been misled by problems  
434 similar to those outlined in the Introduction.

435

436

437 **Figure 4:**

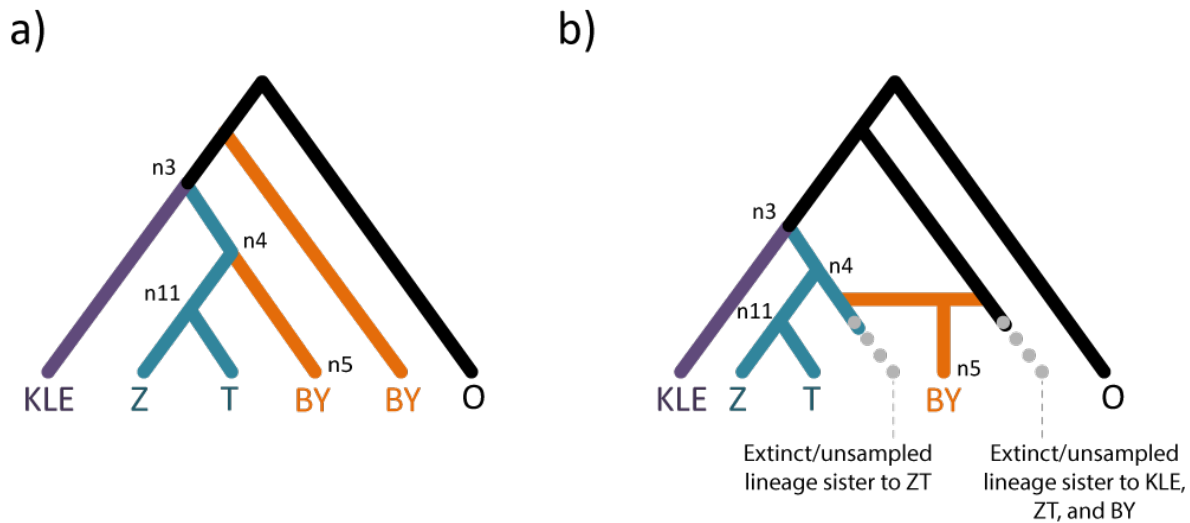

438

439 We used 3,987 gene trees (after filtering, see Methods) across 27 yeast species (Fig. S1)  
440 from Marcet-Houben and Gabaldón (2015) to reinvestigate the polyploid history of baker's yeast  
441 using GRAMPA. We observed that the optimal MUL-tree inferred by GRAMPA has a  
442 reconciliation score of 144,166. We then compared this score to the scores of MUL-trees  
443 representing three alternative hypotheses. First, we wanted to confirm that we could detect the  
444 WGD by comparing the reconciliation score of the lowest scoring MUL-tree to that of the  
445 singly-labeled tree—this tree had a score of 169,031. The fact that allopolyploidy scored much  
446 lower than no polyploidy indicates that enough phylogenetic signal remains in these species to  
447 differentiate the two scenarios. This signal is enhanced by the fact that there are 12 polyploid  
448 species represented in the gene trees, meaning that asymmetric gene loss between sub-genomes  
449 is more likely to be detected. We also compared scenarios of auto- vs. allopolyploidy. The  
450 autopolyploid MUL-tree had a score of 179,636, and because the optimal allopolyploid MUL-

451 tree has a score much lower than this, we confirm the result from Marcet-Houben and Gabaldón  
452 (2015) that the modern baker's yeast clade is the result of a hybridization event.

453 We confirmed that GRAMPA's optimal MUL-tree also corresponds to the specific  
454 allopolyploid scenario proposed by Marcet-Houben and Gabaldón (2015; Fig 4a). These results  
455 suggest that the most probable parental lineages are an extinct lineage sister to the clade formed  
456 by *Z. rouxii* and *T. delbrueckii* (the so-called ZT clade) and an extinct lineage sister to the KLE,  
457 ZT, and the modern BY clades (Fig. 4). The next lowest scoring MUL-tree had about one  
458 thousand more duplications and losses, and would have placed the second parental lineage as an  
459 extinct lineage sister to only the ZT and modern BY clades. Our results therefore support the  
460 claim of Marcet-Houben and Gabaldón (2015) for an allopolyploid origin of the clade including  
461 baker's yeast, and further confirm their inferred parental lineages of this clade.

462

### 463 *Analysis of bread wheat*

464 We also applied GRAMPA to 9,147 gene trees from the clade including the hexaploid  
465 species, *Triticum aestivum*, commonly known as bread wheat. This species is the result of three  
466 hybridization events, two leading to a WGD (Petersen et al. 2006) and one resulting in a  
467 homoploid hybrid species (Marcussen et al. 2014). Analysis of this clade is an especially useful  
468 example to demonstrate the accuracy of GRAMPA because the relationships between sub-  
469 genomes are known, and genes have been assigned to their sub-genome of origin. With genes  
470 labeled according to sub-genome, standard reconciliation can be performed in an approach  
471 similar to ours but with a pre-labeled MUL-tree (Altenhoff et al 2015; Bolser et al. 2015). It also



472 presents an interesting test because the current implementation of our algorithm is only designed  
473 to map one WGD per tree.

474 To show that GRAMPA is able to recover the correct MUL-tree for the clade including *T.*  
475 *aestivum* and nine other Poaceae species (Fig. S6), we started by analyzing genes from two sub-  
476 genomes at a time and removing all labels associating genes with sub-genomes. When we  
477 allowed GRAMPA to search for the optimal MUL-tree, we recovered the one with correct sub-  
478 genome relationships every time (Fig. S8, Table S5). We also investigated GRAMPA's results  
479 without removing genes from any of the three sub-genomes. Interestingly, when presented with a  
480 singly-labeled tree with only one sub-genome represented (Fig. S9a), GRAMPA's two lowest  
481 scoring MUL-trees were those in which the other two un-represented sub-genomes were  
482 identified as the H2 clades (Fig. S9b and c). This behavior is especially useful because it implies  
483 that GRAMPA could be used to search for multiple allopolyploidy events.

484

## 485 Discussion

486 We have developed a method, GRAMPA, to accurately identify whether a polyploidy  
487 event has occurred and to place it in a phylogenetic context. This allows us to identify the  
488 parental lineages of the polyploid species resulting from the hybridization in the case of  
489 allopolyploidy. Our method also allows us to accurately infer the number of duplications and  
490 losses in a clade containing an allopolyploid. Though reconciliation methods on reticulated  
491 phylogenies have been explored before (Yu et al. 2013; To and Scornavacca 2015), this is the  
492 first general method that we know of that performs these types of analyses in the context of  
493 polyploidy and is applicable in a wide variety of contexts. Using our method to re-analyze the

494 neo-allopolyploid bread wheat, the results of our algorithm always align with the accepted  
495 relationships between sub-genomes. Application to the WGD in the baker's yeast clade has also  
496 confirmed both an allopolyploid origin and the parental lineages inferred previously (Marcet-  
497 Houben and Gabaldón 2015). Our method works because it considers the genes duplicated  
498 during polyploidization in all possible genealogical contexts: as paralogs in the case of no  
499 polyploidy, as ohnologs in the case of autopolyploidy, and as homoeologs in the case of  
500 allopolyploidy.  $K_s$ - and standard LCA-based methods fail because they do not make these  
501 distinctions.

502         There are cases where our method may incorrectly report that no polyploidy has  
503 occurred, even when it has. The most likely situation in which this will occur is when so many  
504 of the ohnologs or homoeologs from the WGD have been lost that the singly-labeled tree has the  
505 lowest reconciliation score. This scenario is challenging for all methods that attempt to identify  
506 WGDs (Table 1). For genes without any sort of homolog in the same genome, reconciliation to  
507 MUL-trees requires a gene loss. Because of this cost, it may seem intuitive that the point at  
508 which one can no longer infer a WGD is when more than half of all genes duplicated have  
509 returned to single-copy. As there are only ~550 homoeologs remaining in the *S. cerevisiae*  
510 genome (Byrne and Wolfe 2005), it may therefore be surprising that we correctly favor  
511 allopolyploidy over no polyploidy in our analysis of yeast genomes. The key factor in our  
512 statistical power to reject a history without WGD appears to be the fact that there are distinct  
513 homoeologs lost or preserved in different lineages (cf. Scannell et al. 2007). It is the sum total of  
514 these homoeologs that enable us to infer an allopolyploid history, such that the large number of  
515 polyploid species included in our analysis has helped to support this inference. We caution users  
516 of our method that any conclusions concerning the presence or absence of polyploidy is therefore

517 dependent on many factors, including the age of the polyploidy event, the rate of duplicate gene  
518 loss (and the asymmetry of loss between homoeologs), and the number of polyploid lineages  
519 sampled.

520           Importantly, errors in gene tree reconstruction or incongruence caused by biological  
521 phenomena such as incomplete lineage sorting are problems in any tree-based analysis of  
522 polyploidy, and methods to both quantify and account for them have been established in other  
523 contexts (e.g. Jones et al. 2013; Zwickl et al. 2014). Gene tree incongruence is also a problem  
524 for reconciliation algorithms (Hahn 2007), though solutions have been proposed to deal with  
525 incongruence due to ILS (e.g. Vernot et al. 2008; Rasmussen and Kellis 2012; Yu et al. 2013). In  
526 the future it will be valuable to implement a similar solution for the case of reconciliation applied  
527 to WGDs, or a solution based on ILS in species networks (Jones et al. 2013). Methods that do  
528 not rely on gene tree reconstruction are also viable alternatives for very recent polyploidy events  
529 (Roux and Pannell 2015).

530           The algorithm and associated software presented here should allow researchers to re-  
531 examine many published cases of polyploidy, in order to determine whether these events were  
532 auto- or allopolyploidy. While many clades of plants often have multiple WGD events within  
533 them, our re-analysis of the wheat data gives us confidence that our method can be expanded to  
534 identify multiple polyploidy events in the same tree. For cases with only a single WGD, our  
535 method provides accounting of duplication and loss, as well as the placement of these events in a  
536 phylogenetic context.

537

538 **Acknowledgements**

539 We thank Clara Boothby for comments on the manuscript, Marina Marcet-Houben for helpful  
540 feedback regarding the yeast data, Ben Moore for information about the wheat data, and Luay  
541 Nakhleh and Celine Scornavacca for pointing out important missing references. Thomas  
542 Marcussen, one anonymous reviewer, and Susanne Renner also provided helpful comments. This  
543 work was funded by National Science Foundation grant DBI-1564611 to MWH.

544

## 545 **References**

- 546 Adams KL, Wendel JF. 2005. Polyploidy and genome evolution in plants. *Curr Opin*  
547 *Plant Biol.* 8(2):135-141.
- 548 Altenhoff AM, Škunca N, Glover N, Train C-M, Sueki A, Piližota I, Gori K, Tomiczek  
549 B, Müller S, Redestig H, Gonnet GH, Dessimoz C. 2015. The OMA orthology  
550 database in 2015: Function predictions, better plant support, synteny view, and  
551 other improvement. *Nucleic Acids Res.* 43(Database issue):D240-D249.
- 552 Amores A, Force A, Yan YL, Joly L, Amemiya C, Fritz A, Ho RK, Langeland J, Prince  
553 V, Wang YL, Westerfield M, Ekker M, Postlethwait JH. 1998. Zebrafish hox  
554 clusters and vertebrate genome evolution. *Science.* 282(5394):1711-1714.
- 555 Barker MS, Kane NC, Matvienko M, Kozik A, Michelmore RW, Knapp SJ, Rieseberg  
556 LH. 2008. Multiple paleopolyploidizations during the evolution of the  
557 Compositae reveal parallel patterns of duplicate gene retention after millions of  
558 years. *Mol Biol Evol.* 25(11):2445-2455.
- 559 Barker MS, Vogel H, Schranz ME. 2009. Paleopolyploidy in the Brassicales: analyses of

560 the *Cleome* transcriptome elucidate the history of genome duplications in  
561 *Arabidopsis* and other Brassicales. *Genome Biol Evol.* 1:391-399.

562 Barker MS, Arrigo N, Baniaga AE, Li Z, Levin DA. 2015. On the relative abundance of  
563 autopolyploids and allopolyploids. *New Phytol.* 210:391-398.

564 Blanc G, Hokamp K, Wolfe KH. 2003. A recent polyploidy superimposed on older large-  
565 scale duplications in the *Arabidopsis* genome. *Genome Res.* 13(2):137-144.

566 Blanc G, Wolfe KH. 2004. Widespread paleopolyploidy in model plant species inferred  
567 from age distributions of duplicate genes. *The Plant Cell.* ;16(7):1667-1678.

568 Bolser DM, Kerhornou A, Walts B, Kersey P. 2015. Triticeae resources in Ensembl  
569 Plants. *Plant Cell Physiol.* 56(1):e3.

570 Bowers JE, Chapman BA, Rong J, Paterson AH. 2003. Unravelling angiosperm genome  
571 evolution by phylogenetic analysis of chromosomal duplication events. *Nature.*  
572 422(6930):433-438.

573 Brassac J, Blattner FR. 2015. Species-level phylogeny and polyploid relationships in  
574 *Hordeum* (Poaceae) inferred by next-generation sequencing and *in silico* cloning  
575 of multiple nuclear loci. *Syst Biol.* 64(5):792-808.

576 Byrne KP, Wolfe KH. 2005. The Yeast Gene Order Browser: Combining curated  
577 homology and syntenic context reveals gene fate in polyploid species. *Genome*  
578 *Res.* 15(10):1456-1461.

579 Cannon SB, McKain MR, Harkess A, Nelson MN, Dash S, Deyholos MK, Peng Y, Joyce  
580 B, Stewart CN Jr, Rolf M, Kutchan T, Tan X, Chen C, Zhang Y, Carpenter E,  
581 Wong GK, Doyle JJ, Leebens-Mack J. 2015. Multiple polyploidy events in the

- 582 early radiation of nodulating and nonnodulating legumes. *Mol Biol Evol.*  
583 32(1):193-210.
- 584 Chalup L, Grabiele M, Solís Neffa V, Seijo G. 2012. Structural karyotypic variability and  
585 polyploidy in natural populations of the South American *Lathyrus nervosus* Lam.  
586 (Fabaceae). *Plant Syst Evol.* 298:761.
- 587 Crow KD, Wagner GP. 2006. What is the role of genome duplication in the evolution of  
588 complexity and diversity? *Mol Biol Evol.* 23(5):887-892.
- 589 Cui L, Wall PK, Leebens-Mack JH, Lindsay BG, Soltis DE, Doyle JJ, Soltis PS, Carlson  
590 JE, Arumuganathan K, Barakat A, Albert VA, Ma H, dePamphilis CW. 2006.  
591 Widespread genome duplications throughout the history of flowering plants.  
592 *Genome Res.* 16(6):738-749.
- 593 Dehal P, Boore JL. 2005. Two rounds of whole genome duplication in the ancestral  
594 vertebrate. *PLoS Biol.* 3(10):e314.
- 595 Durand D, Halldórsson BV, Vernet B. 2006. A hybrid micro-macroevolutionary  
596 approach to gene tree reconstruction. *J Comput Biol.* 13(2):320-335.
- 597 Edger PP, Heidel-Fischer HM, Bekaert M, Rota J, Glöckner G, Platts AE, Heckel DG,  
598 Der JP, Wafula EK, Tang M, Hofberger JA, Smothson A, Hall JC, Blanchette M,  
599 Bureau TE, Wright SI, dePamphilis CW, Schranz ME, Barker MS, Conant GC,  
600 Wahlberg N, Vogel H, Pires JV, Wheat CW. 2015. The butterfly plant arms-race  
601 escalated by gene and genome duplications. *Proc Natl Acad Sci USA.*  
602 112(27):8362-8366.
- 603 Fitch WM. 1970. Distinguishing homologous from analogous proteins. *Syst Zool.* 119(2):  
604 99-113.

- 605 Glover NM, Redestig H, Dessimoz C. 2016. Homoeologs: What are they and how do we  
606 infer them? *Trends Plant Sci.* S1360-1385(16):00059-5.
- 607 Goodman M, Czelusniak J, William Moore G, Romero-Herrera AE, Matsuda G. 1979.  
608 Fitting the gene lineage into its species lineage, a parsimony strategy illustrated  
609 by cladograms constructed from globin sequences. *Syst Biol.* 28(2):132-163.
- 610 Guigó R, Muchnik I, Smith TF. 1996. Reconstruction of ancient molecular phylogeny.  
611 *Mol Phylogenet Evol.* 6(2):189-213.
- 612 Hahn MW. 2007. Bias in phylogenetic tree reconciliation methods: implications for  
613 vertebrate genome evolution. *Genome Biol.* 8(7):R141.
- 614 Huber KT, Moulton V. 2006. Phylogenetic networks from multi-labelled trees. *J Math*  
615 *Biol.* 52(5):613-632.
- 616 Huber KT, Oxelman B, Lott M, Moulton V. 2006. Reconstructing the evolutionary  
617 history of polyploids from multilabeled trees. *Mol Biol Evol.* 23(9):1784-1791.
- 618 Huson DH, Rupp R, Scornavacca C. 2006. Phylogenetic networks from trees.  
619 *Phylogenetic Networks*, Cambridge University Press.
- 620 Jiao Y, Wickett NJ, Ayyampalayam S, Chanderbail AS, Landherr L, Ralph PE, Tomsho  
621 LP, Hu Y, Liang H, Soltis PS, Soltis DE, Clifton SW, Schlarbaum SE, Schuster  
622 SC, Ma H, Leebens-Mack J, dePamphilis CW. 2011. Ancestral polyploidy in seed  
623 plants and angiosperms. *Nature.* 473(7345):97-100.
- 624 Jones G, Sagitov S, Oxelman B. 2013. Statistical inference of allopolyploid species  
625 networks in the presence of incomplete lineage sorting. *Syst Biol.* 62(3):467-478.
- 626 Junier T, Zdobnov EM. 2010. The Newick Utilities: high-throughput phylogenetic tree  
627 processing in the UNIX shell. *Bioinformatics.* 26:1669-1670.

- 628 Kellis M, Birren BW, Lander ES. 2004. Proof and evolutionary analysis of ancient  
629 genome duplication in the yeast *Saccharomyces cerevisiae*. *Nature*.  
630 428(6983):617-624.
- 631 Kersey PJ, Allen JE, Armean I, Boddu S, Bolt BJ, Carvalho-Silva D, Christensen M,  
632 Davis P, Falin LJ, Grabmueller C, Humphrey J, Kerhornou A, Khobova J,  
633 Aranganathan NK, Langridge N, Lowy E, McDowall MD, Maheswari U, Nuhn  
634 M, Kee Ong C, Overduin B, Paulini M, Pedro H, Perry E, Spudich G, Tapanari E,  
635 Walts B, Williams G, Tello-Ruiz M, Stein J, Wei S, Ware D, Bolser DM, Howe  
636 KL, Kulesha E, Lawson D, Maslen G, Staines DM. 2016. Ensembl Genomes  
637 2016: more genomes, more complexity. *Nuc Acids Res*. 44(D1):D574-D580.
- 638 Kim C, Wang X, Lee TH, Jakob K, Lee GJ, Paterson AH. 2014. Comparative analysis of  
639 *Miscanthus* and *Saccharum* reveals a shared whole-genome duplication but  
640 different evolutionary fates. *Plant Cell*. 26(6):2420-2429.
- 641 Li Z, Baniaga AE, Sessa EB, Scascitelli M, Graham SW, Rieseberg LH, Barker MS.  
642 2015. Early genome duplications in conifers and other seed plants. *Sci Adv*.  
643 1(10):e1501084.
- 644 Linder CR, Rieseberg LH. 2004. Reconstructing patterns of reticulate evolution in plants.  
645 *Am J Bot*. 91(10):1700-1708.
- 646 Lott M, Spillner A, Huber KT, Petri A, Oxelman B, Moulton V. 2009. Inferring  
647 polyploid phylogenies from multiply-labeled gene trees. *BMC Evol Biol*. 9:216.
- 648 Lynch M, Conery JS. 2000. The evolutionary fate and consequences of duplicate genes.  
649 *Science*. 290(5495):1151-1155.
- 650 Lynch M, Force A. 2000. The probability of duplicate gene preservation by



- 651 subfunctionalization. *Genetics*. 154(1):459-473.
- 652 Mandáková T, Joly S, Krzywinski M, Mummenhoff K, Lysak MA. 2010. Fast  
653 diploidization in close mesopolyploid relatives of *Arabidopsis*. *Plant Cell*.  
654 22(7):2277-2290.
- 655 Marcussen T, Jakobsen KS, Danihelka J, Ballard HE, Blaxland K, Brysting AK,  
656 Oxelman B. 2012. Inferring species networks from gene trees in high-polyploid  
657 North American and Hawaiian violets (*Viola*, Violaceae). *Syst Biol*. 61(1):107-  
658 126.
- 659 Marcussen T, Sandve SR, Heier L, Spannagl M, Pfeifer M, International Wheat Genome  
660 Sequencing Consortium, Jakobsen KS, Wulff BB, Steuernagel B, Mayer KF,  
661 Olsen OA. 2014. Ancient hybridizations among the ancestral genomes of bread  
662 wheat. *Science*. 345(6194):1250092.
- 663 Marcussen T, Heier L, Brysting AK, Oxelman B, Jakobsen KS. 2015. From gene trees to  
664 a dated allopolyploid network: insights from the angiosperm genus *Viola*  
665 (Violaceae). *Syst Biol*. 64(1):84-101.
- 666 Marcet-Houben M, Gabaldón T. 2015. Beyond the whole genome duplication:  
667 Phylogenetic evidence for an ancient interspecies hybridization in the baker's  
668 yeast lineage. *PLoS Biol*. 13(8):e1002220.
- 669 Mayrose I, Zhan SH, Rothfels CJ, Magnuson-Ford K, Barker MS, Rieseberg LH, Otto  
670 SP. 2011. Recently formed polyploid plants diversify at lower rates. *Science*.  
671 333:1257.
- 672 Muir CD, Hahn MW. 2015. The limited contribution of reciprocal gene loss to increased

- 673 speciation rates following whole genome duplication. *The American Naturalist*.  
674 185:70-86.
- 675 Ohno S. 1970. Evolution by gene duplication. Springer-Verlag
- 676 Page RDM. 1994. Maps between trees and cladistic analysis of historical associations  
677 among genes, organisms, and areas. *Syst Biol*. 43(1):58-77.
- 678 Petersen G, Seberg O, Yde M, Berthelsen K. 2006. Phylogenetic relationship of *Triticum*  
679 and *Aegilops* and evidence for the origin of the A, B, and D genomes of common  
680 wheat (*Triticum aestivum*). *Mol Phylogenet Evol*. 39(1):70-82.
- 681 Popp M, Oxelman B. 2001. Inferring the history of the polyploid *Silene aegaea*  
682 (Caryophyllaceae) using plastid and homoeologous nuclear DNA sequences. *Mol*  
683 *Phylogenet Evol*. 20(3):474-481.
- 684 Rabier C-E, Ta T, Ané C. 2014. Detecting and locating whole genome duplications on a  
685 phylogeny: A probabilistic approach. *Mol Biol Evol*. 31(3):750-762.
- 686 Rasmussen MD, Kellis M. 2012. Unified model of gene duplication, loss, and  
687 coalescence using a locus tree. *Genome Res*. 22(4):755-765.
- 688 Roux C, Pannell JR. 2015. Inferring the mode of origin of polyploidy species from next-  
689 generation sequence data. *Mol Ecol*. 24:1047-1059.
- 690 Scannell DR, Frank AC, Conant GC, Byrne KP, Woolfit M, Wolfe KH. 2007.  
691 Independent sorting-out of thousands of duplicated gene pairs in two yeast species  
692 descended from a whole-genome duplication. *Proc Natl Acad Sci USA*.  
693 104(20):8397-402.
- 694 Sjöstrand J, Arvestad L, Lagergren J, Sennblad B. 2013. GenPhyloData: Realistic  
695 simulation of gene family evolution. *BMC Bioinformatics*. 14:209.

- 696 Soltis PS, Soltis DE. 2009. The role of hybridization in plant speciation. *Annu Rev Plant*  
697 *Biol.* 60:561-588.
- 698 Tiley GP, Ané C, Burleigh JG. 2016 Evaluating and characterizing ancient whole-  
699 genome duplications in plants with gene count data. *Genome Biol Evol.*  
700 8(4):1023-1037.
- 701 To TH, Scornavacca C. 2015. Efficient algorithms for reconciling gene trees and species  
702 networks via duplication and loss events. *BMC Genomics.* 16(10):S6.
- 703 Van de Peer Y. 2004. Computational approaches to unveiling ancient genome  
704 duplications. *Nat Rev Genet.* 5(10):752-763.
- 705 Vernot B, Stolzer M, Goldman A, Durand D. 2008. Reconciliation with non-binary  
706 species trees. *J Comput Biol.* 15(8):981-1006.
- 707 Werth CR, Windham MD. 1991. A model for divergent, allopatric speciation of  
708 polyploid Pteridophytes resulting from silencing of duplicate-gene expression.  
709 *The American Naturalist.* 137(4):515-526.
- 710 Wolfe KH. 2000. Robustness – it’s not where you think it is. *Nat Genet.* 25(1):3-4.
- 711 Wolfe KH, Shields DC. 2007. Molecular evidence for an ancient duplication of the entire  
712 yeast genome. *Nature.* 287(6634):708-713.
- 713 Yu Y, Barnett RM, Nakhleh L. 2013. Parsimonious inference of hybridization in the  
714 presence of incomplete lineage sorting. *Syst Biol.* 62(5):738-751.
- 715 Zmasek CM, Eddy SR. 2001. A simple algorithm to infer gene duplication and speciation  
716 events on a gene tree. *Bioinformatics.* 17(9):821-828.
- 717 Zwickl DJ, Stein JC, Wing RA, Ware D, Sanderson MJ. 2014. Disentangling

718                    methodological and biological sources of gene tree discordanc on *Oryza*  
719                    (Poaceae) chromosome 3. *Syst Biol.* 63(5):645-659.  
720

## 721 **Figure Captions**

722 **Figure 1. Methods to identify the placement of WGD in a phylogeny.** (a)  $K_s$ -based methods  
723 can correctly date cases of autopolyploidy. Here the peak in the distribution of  $K_s$  values between  
724 paralogs in a single species (shown as a density plot on the left) corresponds to the duplication  
725 node in the tree. (b)  $K_s$ -based methods incorrectly date cases of allopolyploidy. Here a  
726 hybridization event occurred between species B and C (in blue) resulting in the allopolyploid  
727 lineage that gave rise to the XYZ clade (orange). In cases like this the peak in the distribution of  
728  $K_s$  for a single species corresponds to the most recent common ancestor of the two parental  
729 lineages, rather than the timing of the WGD. Similar results would be found using LCA  
730 reconciliation methods discussed in the text.

731

732 **Figure 2. Representation of allopolyploid clades.** Given that a hybridization event occurred  
733 between species B and C (in blue) resulting in the allopolyploid lineage that gave rise to the  
734 XYZ clade (orange), species relationships can be represented in three ways. (a) Most species tree  
735 reconstruction methods represent each species with a single label. This is not correct for  
736 polyploid species as these singly-labeled species trees incorrectly represent each polyploid  
737 species with a single label, showing only one of the two possible topologies. (b) Phylogenetic  
738 networks correctly display the species-level phylogeny by showing hybridization events. (c)  
739 Multi-labeled trees (MUL-trees) are genome-level phylogenies equivalent to networks, and  
740 therefore both sub-genomes of the polyploid species are represented and it is easy to identify the  
741 parental lineages involved in the hybridization event. The relative placement of hybridization in  
742 the phylogeny is implicit in this representation as the point at which both sub-genomes originate.

743

744 **Figure 3. Reconciliation with a gene tree from an allopolyploid lineage.** (a) A representative  
745 gene tree is shown, with every homolog labeled, including the two homoeologs from  
746 allopolyploid species B. Internal nodes are also labeled to understand the mappings below. (b)  
747 Top: Reconciliation to a pre-defined singly-labeled species tree, with maps between gene tree  
748 nodes and species tree nodes shown (species tree nodes are labeled 1S, 2S, and 3S). In this case,  
749 genes B1 and B2 are treated as paralogs and extra duplications and losses are inferred, and the  
750 duplications are placed ancestral to the actual parental lineages (A and D) of the allopolyploid.  
751 Bottom: The reconciled gene tree showing the duplications (circles) and losses (dashed branches)  
752 inferred. (c) Reconciliation to a pre-defined MUL-tree, with both allopolyploid sub-genomes  
753 represented, with maps between gene tree nodes and MUL-tree nodes shown (MUL-tree nodes  
754 are labeled 1M, 2M, 3M, and 4M). In this case, genes B1 and B2 are treated as homoeologs and  
755 using our algorithm no extra duplications or losses are inferred.

756

757 **Figure 4. The inferred MUL-tree and species network for the baker's yeast data.** BY:  
758 baker's yeast clade, Z: *Z. rouxii*, T: *T. delbruekii*, KLE: KLE clade, O: Outgroups. See  
759 Supplementary Figure S3 for full tree and all node labels. (a) The optimal MUL-tree inferred  
760 when searching for both H1 and H2. H1 was confirmed to be on the branch leading to the  
761 baker's yeast clade (as normally represented in a species tree; specified by node n5), while H2  
762 was inferred to be ancestral to the KLE, ZT, and BY clades (n3). (b) The optimal MUL-tree as a  
763 network. This representation highlights the two parental lineages of the allopolyploid event: an

764 extinct or unsampled lineage sister to the ZT clade, and an extinct or unsampled lineage sister the  
765 KLE, ZY, and BY clades.

## 766 **Supplementary Figure Captions**

767 **Figure S1: Scenarios with various levels of extinction of parental lineages.** In each panel, A'  
768 and B' have hybridized to form the polyploid clade, P. We define A' and B' as the parental  
769 *species*. A is more closely related to A' than B', so we say that A and A' make up one parental  
770 *lineage* of the polyploid (teal). Likewise, B is more closely related to B' than to A', thus making  
771 a second parental *lineage* (purple). **(a)** With no extinctions and all parental species sampled,  
772 GRAMPA will recover the correct, allopolyploid MUL-tree and correctly infer the parental  
773 lineages. **(b)** If a single parental *species* is extinct or unsampled (A' in this instance), but other  
774 species from that parental *lineage* are extant and sampled, GRAMPA will still infer an  
775 allopolyploid MUL-tree and correctly identify the parental lineages. This would still be the case  
776 if both parental *species* were extinct. **(c)** Even if an entire parental *lineage* is extinct or  
777 unsampled, GRAMPA will still infer allopolyploidy and correctly imply the second parental  
778 lineage. Only one species from one parental lineage need be present to be able to correctly infer  
779 allopolyploidy. **(d)** In cases where both parental lineages of an allopolyploid are entirely extinct,  
780 GRAMPA will incorrectly infer autopolyploidy with a WGD occurring between the two sub-  
781 genomes of the polyploid clade (orange circle in the inferred network).

782

783 **Figure S2: An example scenario of GRAMPA's heuristic speed-ups.** Given the MUL-tree in  
784 **(a)** with two sub-genomes represented in the XYZ clade, the base algorithm will try all possible  
785 combinations of initial maps for genes from polyploid species, as in **(b)**. If polyploid species

786 group together in the gene tree, the most parsimonious initialization will always have them  
787 mapping to the same sub-genome. We collapse these into groups to reduce the number of  
788 possible maps we have to try, as in (c). Furthermore, if the polyploid lineage has a sister clade in  
789 the singly-labeled species phylogeny (species A, in this case), we can look for the same pattern  
790 in the gene trees and fix the maps of any groups we find, as in (d).

791

792 **Figure S3: The singly-labeled species tree topology used to generate MUL-trees and gene**

793 **trees for the manual reconciliations and an example MUL-tree. (a)** Node H1 defines the

794 polyploid clade made up of species X, Y, and Z. The node ancestral to species C and D is

795 specified as H2 as an example, however any other node outside of the polyploid clade can be

796 considered as H2. If H1 and H2 are the same node, the resulting MUL-tree is indicative of

797 autopolyploidy. (b) The MUL-tree generated by using the H1 and H2 nodes defined in (a).

798

799 **Figure S4: The various simulation scenarios used to test GRAMPA. (a)** Gene trees simulated

800 with allopolyploidy. The allopolyploid genome topology (G) was used as input for JPrIME.

801 Three scenarios of ILS were considered, with the two discordant topologies also being used as

802 input to JPrIME. Additionally, five scenarios of various gene gain-loss (G-L) rates were

803 considered. This led to 15 sets of 1000 gene trees that were subsequently used as inputs to

804 GRAMPA, along with both singly-labeled topologies. (b) Gene trees simulated with

805 autopolyploidy. The autopolyploid genome topology G was used as input for JPrIME with

806 varying scenarios of ILS and G-L. (c) Gene trees simulated with no polyploidy. The species

807 topology (S) was used as input to JPrIME with varying scenarios of ILS and G-L.



808

809

810 **Figure S5: Yeast phylogeny.** (a) The phylogeny from Marcet-Houben and Gabaldón (2015) of  
811 27 yeast species used in the analysis. The putative H1 node is n5 while the inferred H2 node is  
812 n3. (b) A simplified version of the species tree showing only the clades and nodes of interest.

813

814 **Figure S6: Wheat phylogeny.** (a) The full species tree used for the bread wheat data. Common  
815 bread wheat, *Triticum aestivum* is represented by three sub-genomes, A, B, and D. Nine other  
816 closely related species were considered. (b) A simplified version of the tree showing only the  
817 three sub-genomes of bread wheat (labeled A, B, and D), and the donor species of two of the  
818 sub-genomes, *A. tauschii* and *T. urartu* (abbreviated AT and TU, respectively).

819

820 **Figure S7: Demonstration of penalties when reconciling polyploids to singly-labeled trees.**

821 (a) When allopolyploidy has occurred, as shown in the MUL-tree on the left, there is a much  
822 higher score for reconciling to a singly-labeled tree when both homoeologous copies are retained  
823 (gene tree 1) or when the copy that is not represented in the singly-labeled tree is retained while  
824 the other is lost (gene tree 3), as indicated by the negative difference in reconciliation scores  
825 ( $\Delta S$ ). We see only relatively small penalties for reconciling to the correct MUL-tree in scenarios  
826 that favor the singly-labeled tree, such as retention of the homoeologous copy that is represented  
827 in the singly-labeled tree and loss of the other copy (gene trees 2 and 4). (b) When  
828 autopolyploidy has occurred, as shown in the MUL-tree on the left, the penalties for reconciling  
829 to a singly-labeled tree still exist when both ohnologs are present, but are much smaller (gene

830 tree 1). In fact, since there is only one placement of both sub-genomes, a loss of either ohnolog  
831 favors the singly-labeled tree. This means we can still distinguish autopolyploidy from no  
832 polyploidy, but have much less power to do so than with allopolyploidy (i.e. many more  
833 ohnologs must be retained to reject no polyploidy).

834

835 **Figure S8: Wheat polyploidy events inferred by GRAMPA when considering only 2 sub-**  
836 **genomes.** In each panel, the top tree is the species tree input for GRAMPA and the bottom panel  
837 is the optimal MUL-tree inferred. The bread wheat species, *Triticum aestivum*, is abbreviated  
838 TA. **(a)** Only sub-genomes A and D are present in the gene trees and the position of TA in the  
839 input singly-labeled tree is at sub-genome A. The optimal MUL-tree shows the correct placement  
840 of sub-genome D. **(b)** Only sub-genomes A and B are present in the gene trees and the position  
841 of TA in the input singly-labeled tree is at sub-genome A. The optimal MUL-tree shows the  
842 correct placement of sub-genome B. **(c)** Only sub-genomes D and B are present in the gene trees  
843 and the position of TA in the input singly-labeled tree is at sub-genome D. The optimal MUL-  
844 tree shows the correct placement of sub-genome B.

845

846 **Figure S9: Wheat polyploidy events inferred by GRAMPA when considering all 3 sub-**  
847 **genomes.** The top two scoring MUL-trees returned by GRAMPA when considering all three *T.*  
848 *aestivum* (TA) sub-genomes. **(a)** The input species tree given to GRAMPA with only sub-  
849 genome A represented. **(b)** The best scoring MUL-tree finds sub-genome B as the other TA  
850 lineage. **(d)** The second best scoring MUL-tree finds sub-genome D as the other TA lineage.

851
